# Supplementary material for: Climate Change Impact and Variability on Cereal Productivity among Smallholder Farmers under Future Production Systems in West Africa
Source: MDPI journal article supplement (doi:10.3390/su13095191), 2021-05-06
Supplement: s1 [file s1]

**Table S1.** Soil parameters used in simulations for Nioro, Senegal and Navrongo, Ghana.

**Table S1a. Nioro, Senegal**

| Location | Soil ID    | L (cm) | SLL<br>(cm <sup>3</sup> /cm <sup>3</sup> ) | SDUL<br>(cm <sup>3</sup> /cm <sup>3</sup> ) | SAT<br>(cm <sup>3</sup> /cm <sup>3</sup> ) | BD<br>(g/cm <sup>3</sup> ) | OC (%) | pH  | NH <sub>4</sub><br>(mg/kg) | NO <sub>3</sub><br>(mg/kg) |
|----------|------------|--------|--------------------------------------------|---------------------------------------------|--------------------------------------------|----------------------------|--------|-----|----------------------------|----------------------------|
| Nioro    | ITSN840080 | 10     | 0.094                                      | 0.17                                        | 0.297                                      | 1.34                       | 0.340  | 5.1 | 1.2                        | 0.1                        |
|          |            | 20     | 0.093                                      | 0.168                                       | 0.295                                      | 1.34                       | 0.308  | 5.1 | 1.0                        | 0.1                        |
|          |            | 40     | 0.081                                      | 0.149                                       | 0.271                                      | 1.46                       | 0.264  | 5.0 | 0.5                        | 0.1                        |
|          |            | 60     | 0.088                                      | 0.161                                       | 0.293                                      | 1.48                       | 0.250  | 5.3 | 0.5                        | 0.1                        |
|          |            | 80     | 0.085                                      | 0.159                                       | 0.305                                      | 1.51                       | 0.240  | 5.4 | 0.5                        | 0.1                        |
|          |            | 100    | 0.054                                      | 0.103                                       | 0.203                                      | 1.54                       | 0.220  | 5.4 | 0.5                        | 0.1                        |
|          | ITSN840042 | 10     | 0.109                                      | 0.185                                       | 0.444                                      | 1.40                       | 0.480  | 6.1 | 1.2                        | 0.1                        |
|          |            | 20     | 0.109                                      | 0.185                                       | 0.444                                      | 1.40                       | 0.480  | 6.1 | 1.0                        | 0.1                        |
|          |            | 40     | 0.167                                      | 0.253                                       | 0.452                                      | 1.38                       | 0.420  | 5.1 | 0.5                        | 0.1                        |
|          |            | 60     | 0.217                                      | 0.305                                       | 0.445                                      | 1.4                        | 0.417  | 5.0 | 0.5                        | 0.1                        |
|          |            | 80     | 0.261                                      | 0.35                                        | 0.420                                      | 1.47                       | 0.362  | 5.0 | 0.5                        | 0.1                        |
|          |            | 100    | 0.260                                      | 0.348                                       | 0.456                                      | 1.37                       | 0.320  | 5.0 | 0.5                        | 0.1                        |
|          | ITSN840067 | 10     | 0.100                                      | 0.162                                       | 0.380                                      | 1.46                       | 0.538  | 5.6 | 1.2                        | 0.1                        |
|          |            | 20     | 0.100                                      | 0.162                                       | 0.380                                      | 1.46                       | 0.538  | 5.6 | 1.0                        | 0.1                        |
|          |            | 40     | 0.120                                      | 0.188                                       | 0.373                                      | 1.48                       | 0.44   | 5.1 | 0.5                        | 0.1                        |
|          |            | 60     | 0.133                                      | 0.195                                       | 0.358                                      | 1.53                       | 0.424  | 5.1 | 0.5                        | 0.1                        |
|          |            | 80     | 0.143                                      | 0.200                                       | 0.375                                      | 1.48                       | 0.380  | 5.1 | 0.5                        | 0.1                        |
|          |            | 100    | 0.155                                      | 0.218                                       | 0.398                                      | 1.51                       | 0.300  | 5.1 | 0.5                        | 0.1                        |
|          | ITSN840056 | 10     | 0.076                                      | 0.154                                       | 0.396                                      | 1.42                       | 0.310  | 6.4 | 1.2                        | 0.1                        |
|          |            | 20     | 0.076                                      | 0.154                                       | 0.396                                      | 1.42                       | 0.310  | 6.4 | 1.0                        | 0.1                        |
|          |            | 40     | 0.121                                      | 0.199                                       | 0.376                                      | 1.48                       | 0.295  | 6.4 | 0.5                        | 0.1                        |
|          |            | 60     | 0.129                                      | 0.204                                       | 0.359                                      | 1.53                       | 0.260  | 6.4 | 0.5                        | 0.1                        |
|          |            | 80     | 0.128                                      | 0.203                                       | 0.375                                      | 1.48                       | 0.246  | 6.4 | 0.5                        | 0.1                        |
|          |            | 100    | 0.166                                      | 0.246                                       | 0.352                                      | 1.50                       | 0.246  | 5.4 | 0.5                        | 0.1                        |

L = Depth of the soil layer, SLL = soil lower limit or wilting point, SDUL = soil drained upper limit or field capacity, SAT = saturated water content, BD = bulk density, OC = organic carbon.

**Table S1b: Navrongo, Ghana**

| Location | Soil ID | L (cm) | SLL<br>(cm <sup>3</sup> /cm <sup>3</sup> ) | SDUL<br>(cm <sup>3</sup> /cm <sup>3</sup> ) | SAT<br>(cm <sup>3</sup> /cm <sup>3</sup> ) | BD (g/cm <sup>3</sup> ) | OC (%) | pH  | NH <sub>4</sub><br>(mg/kg) | NO <sub>3</sub><br>(mg/kg) |
|----------|---------|--------|--------------------------------------------|---------------------------------------------|--------------------------------------------|-------------------------|--------|-----|----------------------------|----------------------------|
| Navrongo | GHNA01  | 5      | 0.052                                      | 0.176                                       | 0.352                                      | 1.43                    | 0.30   | 5.5 | 1.0                        | 0.5                        |
|          |         | 15     | 0.052                                      | 0.176                                       | 0.352                                      | 1.43                    | 0.30   | 5.5 | 1.0                        | 0.5                        |
|          |         | 30     | 0.052                                      | 0.176                                       | 0.321                                      | 1.45                    | 0.29   | 5.3 | 0.5                        | 0.5                        |
|          |         | 50     | 0.073                                      | 0.192                                       | 0.320                                      | 1.45                    | 0.25   | 5.3 | 0.5                        | 0.5                        |
|          | GHNA02  | 5      | 0.082                                      | 0.213                                       | 0.352                                      | 1.56                    | 0.39   | 6.2 | 1.0                        | 0.5                        |
|          |         | 15     | 0.082                                      | 0.213                                       | 0.352                                      | 1.56                    | 0.39   | 6.2 | 1.0                        | 0.5                        |
|          |         | 30     | 0.090                                      | 0.209                                       | 0.321                                      | 1.58                    | 0.36   | 5.9 | 0.5                        | 0.5                        |

|        |    |       |       |       |      |      |     |     |     |
|--------|----|-------|-------|-------|------|------|-----|-----|-----|
|        | 50 | 0.110 | 0.205 | 0.320 | 1.56 | 0.32 | 5.9 | 0.5 | 0.5 |
| GHNA03 | 5  | 0.054 | 0.131 | 0.353 | 1.67 | 0.58 | 5.1 | 2.0 | 0.5 |
|        | 15 | 0.054 | 0.131 | 0.353 | 1.67 | 0.58 | 5.1 | 1.0 | 0.5 |
|        | 30 | 0.094 | 0.119 | 0.359 | 1.74 | 0.56 | 5.4 | 1.0 | 0.5 |
|        | 50 | 0.106 | 0.192 | 0.369 | 1.83 | 0.45 | 5.3 | 0.5 | 0.5 |
|        | 5  | 0.085 | 0.156 | 0.315 | 1.49 | 0.80 | 5.2 | 2.0 | 0.5 |
| GHNA04 | 15 | 0.085 | 0.156 | 0.315 | 1.49 | 0.80 | 5.2 | 1.0 | 0.5 |
|        | 30 | 0.091 | 0.184 | 0.379 | 1.55 | 0.64 | 5.4 | 1.0 | 0.5 |
|        | 50 | 0.132 | 0.21  | 0.372 | 1.58 | 0.51 | 5.2 | 0.5 | 0.5 |

L = Depth of the soil layer, SLL = soil lower limit or wilting point, SDUL = soil drained upper limit or field capacity,  
SAT = saturated water content, BD = bulk density, OC = organic carbon.
